# Supplementary material for: Detecting protein complexes in a PPI network: a gene ontology based multi-objective evolutionary approach
Source: Royal Society of Chemistry journal article supplement (doi:10.1039/c2mb25302j), 2012-08-16
Supplement: c2mb25302j_3.pdf [file c2mb25302j_3.pdf]

## Supplementary Tables

Supplementary tables describe eight results predicted by PROCOMOSS using Lin Jiang and Kappa measure in each of the datasets MIPS and DIP. Column 6 and 7 of each table describes the most Most Significant GO-terms and GO-id under biological process category. The two tables constructed using the results of PROCOMOSS\_Lin\_bp in Dip dataset and PROCOMOSS\_Kappa\_mf for MIPS dataset are found in main text.

### 1 In MIPS Dataset

Table 1: Protein complexes predicted by PROCOMOSS in MIPS dataset using Kappa measure (biological process)

| Sl No. | Real Protein Complex                                           | Com- | Predicted Protein Complex                        | p-value  | % of protein covered | Most Significant GO-term                                                                       | Go-id      |
|--------|----------------------------------------------------------------|------|--------------------------------------------------|----------|----------------------|------------------------------------------------------------------------------------------------|------------|
| 1      | mRNA decapping complex                                         |      | Dcp1 Dcp2 Edc3 Kem1 Rpm2 Ybr094w                 | 1.87E-14 | 66.67                | RNA catabolic process                                                                          | GO:0006401 |
| 2      | Actin capping complex                                          |      | Cap1 Cap2 Yer071c Yir003w                        | 1.80E-14 | 75.00                | covalent chromatin modification                                                                | GO:0016569 |
| 3      | RNA polymerase II general transcription factor TFIID           |      | Taf1 Taf10 Taf2 Taf5 Taf6 Taf7 Taf8 Tef4         | 7.83E-23 | 75.00                | RNA polymerase II transcriptional preinitiation complex assembly                               | GO:0051123 |
| 4      | Kel1/Lte1 complex                                              |      | Bem2 Fks1 Lte1                                   | 1.35E-15 | 75.00                | organelle fission                                                                              | GO:0048285 |
| 5      | SBF, SWI4-SWI6-dependent cell cycle box binding factor complex |      | Swi4 Swi6                                        | 2.20E-24 | 66.67                | covalent chromatin modification                                                                | GO:0016569 |
| 6      | Clathrin-associated protein AP-3 complex                       |      | Apl5 Apl6 Apm3                                   | 1.47E-16 | 75.00                | biological regulation                                                                          | GO:0065007 |
| 7      | Complex 346                                                    |      | Gcn5 Ngg1 Pdr1 Sgf29 Spt15 Spt20 Taf1 Taf12 Tao3 | 1.24E-23 | 60.00                | biological regulation                                                                          | GO:0065007 |
| 8      | Sec62/Sec63 complex                                            |      | Anp1 Fks1 Sec66 Sec72                            | 1.35E-15 | 66.67                | organelle fission                                                                              | GO:0048285 |
| 9      | Anaphase-promoting complex, cyclosome                          |      | Apc1 Apc2 Apc4 Apc5 Apc9 Cdc16 Cdc23 Cdc27       | 1.07E-24 | 88.89                | anaphase-promoting complex-dependent proteasomal ubiquitin-dependent protein catabolic process | GO:0031145 |
| 10     | Retromer subcomplex                                            |      | Vps29 Vps35 Vps5                                 | 1.47E-16 | 100                  | biological regulation                                                                          | GO:0065007 |
| 11     | Ric1/Rgp1 complex                                              |      | Rgp1 Ric1                                        | 2.20E-24 | 66.67                | covalent chromatin modification                                                                | GO:0016569 |
| 12     | Gim complexes                                                  |      | Gim3 Pac10 Yke2                                  | 1.35E-15 | 100                  | organelle fission                                                                              | GO:0048285 |
| 13     | Vps27/Hse1 protein complex                                     |      | Hse1 Vps27                                       | 5.15E-22 | 100                  | organelle fission                                                                              | GO:0048285 |

Table 2: Protein complexes predicted by PROCOMOSS in MIPS dataset using Kappa measure (cellular component)

| Sl No. | Real plex                                                      | Protein Com-plex | Predicted Protein Complex        | p-value  | % of protein covered | Most Significant GO-term        | Go-id      |
|--------|----------------------------------------------------------------|------------------|----------------------------------|----------|----------------------|---------------------------------|------------|
| 1      | mRNA decapping complex                                         |                  | Dcp1 Dcp2 Edc3 Kem1              | 1.23E-14 | 66.67                | histone acetylation             | GO:0016573 |
| 2      | Act1/Sac6 complex                                              |                  | Act1 Sac6                        | 1.65E-32 | 66.67                | mitotic cell cycle              | GO:0000278 |
| 3      | Ctf19 protein complex                                          |                  | Chl4 Ctf19 Ctf3 Mcm21 Mcm22 Okp1 | 7.75E-26 | 75.00                | organelle fission               | GO:0048285 |
| 4      | RNA polymerase II general transcription factor TFIID           |                  | Taf1 Taf10 Taf2 Taf5 Taf6 Taf8   | 6.96E-22 | 75.00                | chromosome organization         | GO:0051276 |
| 5      | SBF, SWI4-SWI6-dependent cell cycle box binding factor complex |                  | Swi4 Swi6                        | 1.25E-27 | 66.67                | covalent chromatin modification | GO:0016569 |
| 6      | Clathrin-associated protein AP-3 complex                       |                  | Apl5 Apl6 Apm3                   | 5.67E-16 | 75                   | protein localization            | GO:0008104 |
| 7      | Retromer subcomplex                                            |                  | Vps29 Vps35 Vps5                 | 7.90E-16 | 100                  | protein acylation               | GO:0043543 |
| 8      | Ric1/Rgp1 complex                                              |                  | Rgp1 Ric1                        | 1.25E-27 | 66.67                | covalent chromatin modification | GO:0016569 |
| 9      | Gim complexes                                                  |                  | Gim3 Pac10 Yke2                  | 6.96E-22 | 100                  | chromosome organization         | GO:0051276 |
| 10     | HAP subcomplex of elongator complex                            |                  | Elp2 Elp3 Elp4 Iki3              | 1.11E-31 | 66.67                | regulation of transcription     | GO:0045449 |

Table 3: Protein complexes predicted by PROCOMOSS in MIPS dataset using Jiang measure (cellular component)

| Sl No. | Real plex                                            | Protein Com-plex | Predicted Protein Complex                                  | p-value  | % of protein covered | Most significant GO-terms                                        | GO-id      |
|--------|------------------------------------------------------|------------------|------------------------------------------------------------|----------|----------------------|------------------------------------------------------------------|------------|
| 1      | Act1/Sac6 complex                                    |                  | Mgs1 Sac6                                                  | 1.24E-19 | 66.67                | cellular response to stress                                      | GO:0033554 |
| 2      | Ctf19 protein complex                                |                  | Chl4 Ctf19 Ctf3 Mcm21 Mcm22 Nkp1                           | 1.80E-35 | 66.67                | organelle fission                                                | GO:0048285 |
| 3      | RNA polymerase II general transcription factor TFIID |                  | Taf1 Taf10 Taf2 Taf6 Taf8                                  | 5.31E-24 | 62.50                | RNA polymerase II transcriptional preinitiation complex assembly | GO:0051123 |
| 4      | TRAPP II complex                                     |                  | Bet3 Bet5 Gsg1 Kre11 Trs120 Trs130 Trs20 Trs23 Trs31 Trs33 | 1.30E-12 | 83.33                | cellular nitrogen compound biosynthetic process                  | GO:0044271 |
| 5      | Retromer subcomplex                                  |                  | Vps29 Vps35                                                | 2.16E-24 | 66.67                | organelle fission                                                | GO:0048285 |
| 6      | Ric1/Rgp1 complex                                    |                  | Rgp1 Ric1                                                  | 4.14E-33 | 66.67                | M phase                                                          | GO:0000279 |
| 7      | Gim complexes                                        |                  | Gim3 Pac10 Yke2                                            | 6.59E-07 | 100                  | tubulin complex assembly                                         | GO:0007021 |
| 8      | HAP subcomplex of elongator complex                  |                  | Elp2 Elp3 Elp4 Iki3                                        | 1.80E-35 | 66.67                | organelle fission                                                | GO:0048285 |
| 9      | Vps27/Hse1 protein complex                           |                  | Hse1 Vps27                                                 | 2.62E-18 | 100                  | M phase of mitotic cell cycle                                    | GO:0000087 |
| 10     | Complex 479                                          |                  | Msn5 Num1                                                  | 1.80E-35 | 66.67                | organelle fission                                                | GO:0048285 |

Table 4: Protein complexes predicted by PROCOMOSS in MIPS dataset using Lin measure (molecular function)

| Sl No. | Real Protein Complex                                           | Predicted Protein Complex                  | p-value  | % of protein covered | Most significant GO-terms                                                                      | GO-id      |
|--------|----------------------------------------------------------------|--------------------------------------------|----------|----------------------|------------------------------------------------------------------------------------------------|------------|
| 1      | mRNA decapping complex                                         | Dcp1 Dcp2 Edc3 Kem1                        | 1.53E-20 | 66.67                | histone acetylation                                                                            | GO:0016573 |
| 2      | Ctf19 protein complex                                          | Chl4 Ctf19 Ctf3 Mcm21 Mcm22 Nkp1 Okp1      | 1.43E-36 | 77.78                | organelle fission                                                                              | GO:0048285 |
| 3      | RNA polymerase II general transcription factor TFIID           | Taf1 Taf10 Taf2 Taf5 Taf6 Taf8             | 7.83E-23 | 75                   | RNA polymerase II transcriptional preinitiation complex assembly                               | GO:0051123 |
| 4      | Kell/Lte1 complex                                              | Bem2 Kell Lte1                             | 7.42E-27 | 75                   | cellular component organization at cellular level                                              | GO:0071842 |
| 5      | Spindle pole body                                              | Spc72 Spc97 Spc98 Tub4                     | 1.19E-17 | 80                   | histone acetylation                                                                            | GO:0016573 |
| 6      | SBF, SWI4-SWI6-dependent cell cycle box binding factor complex | Swi4 Swi6                                  | 1.78E-19 | 66.67                | mitotic cell cycle                                                                             | GO:0000278 |
| 7      | Clathrin-associated protein AP-3 complex                       | Apl5 Apl6 Apm3                             | 2.05E-16 | 75                   | protein localization                                                                           | GO:0008104 |
| 8      | Anaphase-promoting complex, cyclosome                          | Apc1 Apc2 Apc4 Apc5 Apc9 Cdc16 Cdc23 Cdc27 | 2.40E-27 | 88.89                | anaphase-promoting complex-dependent proteasomal ubiquitin-dependent protein catabolic process | GO:0031145 |
| 9      | Retromer subcomplex                                            | Vps29 Vps35 Vps5                           | 2.05E-16 | 100                  | protein localization                                                                           | GO:0008104 |
| 10     | Ric1/Rgp1 complex                                              | Rgp1 Ric1                                  | 1.78E-19 | 66.67                | mitotic cell cycle                                                                             | GO:0000278 |
| 11     | Gim complexes                                                  | Gim3 Pac10 Yke2                            | 8.70E-27 | 100                  | mitotic cell cycle                                                                             | GO:0000278 |
| 12     | HAP subcomplex of elongator complex                            | Elp2 Elp3 Elp4 Iki3                        | 9.83E-31 | 66.67                | mitotic cell cycle                                                                             | GO:0000278 |
| 13     | Complex 479                                                    | Msn5 Num1                                  | 9.83E-31 | 66.67                | mitotic cell cycle                                                                             | GO:0000278 |

## 2 In DIP Dataset

Table 5: Protein complexes predicted by PROCOMOSS in DIP dataset using Lin measure (cellular component)

| Sl No. | Real plex                                                      | Protein Com- | Predicted Protein Complex                                                                                                   | p-value  | % of protein covered | Most significant GO-terms                       | Go-id      |
|--------|----------------------------------------------------------------|--------------|-----------------------------------------------------------------------------------------------------------------------------|----------|----------------------|-------------------------------------------------|------------|
| 1      | Mitochondrial ribosomal small subunit                          |              | Ehd3 Mrp13 Mrp17 Mrp4 Mrp51 Mrps16 Mrps18 Mrps28 Mrps5 Mrps9 Nam9 Psd2 Rsm10 Rsm22 Rsm23 Rsm24 Rsm25 Rsm26 Rsm27 Rsm7 Ubp10 | 6.98E-52 | 70                   | RNA splicing, via transesterification reactions | GO:0000375 |
| 2      | Complex 54                                                     |              | Aar2 Brr1 Bud31 Csn12 Cwc2 Lsm4 Msl1 Prp11 Prp19 Prp4 Prp45 Prp9 Smd3 Snu114 Snu23 Snu66 Syf1                               | 1.02E-51 | 60.71                | RNA splicing, via transesterification reactions | GO:0000375 |
| 3      | Act1/Sac6 complex                                              |              | Act1 Sac6                                                                                                                   | 3.56E-42 | 66.67                | RNA splicing, via transesterification reactions | GO:0000375 |
| 4      | Complex 170                                                    |              | Hmg1 Rad51                                                                                                                  | 3.19E-23 | 66.67                | establishment of localization                   | GO:0051234 |
| 5      | Complex 173                                                    |              | Ehd3 Mrp13 Mrp17 Mrp4 Mrp51 Mrps16 Mrps18 Mrps28 Mrps5 Mrps9 Nam9 Psd2 Pus7 Rsm10 Rsm22 Rsm23 Rsm24 Rsm26 Rsm7 Ubp10        | 6.98E-52 | 74.07                | RNA splicing, via transesterification reactions | GO:0000375 |
| 6      | Ku complex                                                     |              | Yku70 Yku80                                                                                                                 | 3.56E-42 | 100                  | RNA splicing, via transesterification reactions | GO:0000375 |
| 7      | Complex 187                                                    |              | Brr1 Hta1                                                                                                                   | 3.56E-42 | 100                  | RNA splicing, via transesterification reactions | GO:0000375 |
| 8      | Complex 206                                                    |              | Bem2 Ecm16 Ehd3 Mrp13 Mrp17 Mrp4 Mrp51 Mrps18 Mrps28 Mrps5 Psd2 Pus7 Rsm10 Rsm22 Rsm23 Rsm26 Rsm27 Ubp10                    | 6.98E-52 | 81.81                | RNA splicing, via transesterification reactions | GO:0000375 |
| 9      | Complex 207                                                    |              | Aar2 Bud31 Snt309                                                                                                           | 8.80E-96 | 75                   | RNA splicing, via transesterification reactions | GO:0000375 |
| 10     | SBF, SWI4-SWI6-dependent cell cycle box binding factor complex |              | Swi4 Swi6                                                                                                                   | 5.20E-53 | 66.67                | RNA splicing, via transesterification reactions | GO:0000375 |
| 11     | Complex 263                                                    |              | Aar2 Snu66                                                                                                                  | 9.94E-67 | 66.67                | RNA splicing, via transesterification reactions | GO:0000375 |
| 12     | Complex 288                                                    |              | Ret1 Rpc17 Rpc19 Rpc25 Rpc37 Rpc53                                                                                          | 9.94E-67 | 75                   | RNA splicing, via transesterification reactions | GO:0000375 |
| 13     | cAMP-dependent protein kinase complex                          |              | Bcy1 Tpk2                                                                                                                   | 1.02E-51 | 100                  | RNA splicing, via transesterification reactions | GO:0000375 |
| 14     | Complex 317                                                    |              | Kar2 Scj1                                                                                                                   | 3.56E-42 | 100                  | RNA splicing, via transesterification reactions | GO:0000375 |
| 15     | Sec62/Sec63 complex                                            |              | Anp1 Sec63 Sec66 Sec72                                                                                                      | 3.77E-25 | 66.67                | transmembrane transport                         | GO:0055085 |
| 16     | Complex 411                                                    |              | Aar2 Brr1 Bud31 Cwc2 Ecm2 Isy1 Lea1 Msl1 Prp19 Prp4 Prp45 Rse1 Smd2 Smd3 Snt309 Snu114 Snu23                                | 8.80E-96 | 65.38                | RNA splicing, via transesterification reactions | GO:0000375 |
| 17     | Complex 436                                                    |              | Brr1 Cbc2 Csn12 Cus1 Lsm4 Prp11 Prp40 Prp42 Prp9 Rse1 Smd1 Smd2 Snp1 Snu56 Snu66 Snu71                                      | 1.02E-51 | 66.67                | RNA splicing, via transesterification reactions | GO:0000375 |

Table 6: Protein complexes predicted by PROCOMOSS in DIP dataset using Lin measure (molecular function)

| Sl No. | Real Protein Complex | Com- Predicted Protein Complex                                                                                            | p-value  | % of protein covered | Most significant GO-terms                                  | GO-id      |
|--------|----------------------|---------------------------------------------------------------------------------------------------------------------------|----------|----------------------|------------------------------------------------------------|------------|
| 1      | Complex 26           | Atp2 Met18 Rad3 Rpt6 Tfp1 Tub1 Ydj1                                                                                       | 7.36E-37 | 77.78                | rRNA processing                                            | GO:0006364 |
| 2      | 19/22S regulator     | Ecm29 Mlh2 Pre1 Pre5 Pre9 Rad50 Rpn1 Rpn10 Rpn11 Rpn12 Rpn2 Rpn5 Rpn6 Rpn7 Rpn8 Rpt1 Rpt2 Rpt3 Rpt5 Rpt6 Ubp6 Yku70 Yku80 | 2.79E-15 | 67.74                | proteolysis involved in cellular protein catabolic process | GO:0051603 |
| 3      | Ku complex           |                                                                                                                           | 1.05E-11 | 100                  | cellular component biogenesis                              | GO:0044085 |
| 4      | Complex 187          | Brr1 Hta1                                                                                                                 | 5.09E-66 | 100                  | RNA splicing, via transesterification reactions            | GO:0000375 |
| 5      | Complex 207          | Aar2 Bud31 Snt309                                                                                                         | 8.81E-90 | 75                   | RNA splicing, via transesterification reactions            | GO:0000375 |
| 6      | Complex 210          | Dbp9 Pre8 Spa2 Ymr310c                                                                                                    | 5.06E-21 | 100                  | modification-dependent macromolecule catabolic process     | GO:0043632 |
| 7      | Complex 216          | Dbp9 Mds3 Pre5 Pse1 Rpt5 Rrp12 Slx9 Spa2 Ymr310c Yra1                                                                     | 5.06E-21 | 62.5                 | modification-dependent macromolecule catabolic process     | GO:0043632 |
| 8      | Complex 238          | Dbp9 Spa2                                                                                                                 | 5.06E-21 | 100                  | modification-dependent macromolecule catabolic process     | GO:0043632 |
| 9      | Complex 266          | Dip2 Mpp10 Nop1 Nop58 Pwp2 Rok1 Utp22 Utp30 Utp6 Utp7 Ylr003c                                                             | 7.36E-37 | 68.75                | rRNA processing                                            | GO:0006364 |
| 10     | Complex 307          | Nop13 Rlp7                                                                                                                | 2.11E-31 | 100                  | rRNA processing                                            | GO:0006364 |
| 11     | Sec62/Sec63 complex  | Fks1 Sec63 Sec66 Sec72                                                                                                    | 4.54E-15 | 66.67                | localization                                               | GO:0051179 |
| 12     | Complex 384          | Idh2 Lys12 Rvb2                                                                                                           | 1.05E-11 | 75                   | ribosomal large subunit biogenesis                         | GO:0042273 |
| 1      | Complex 411          | Aar2 Bud31 Cdc40 Cwc2 Ecm2 Hsh49 Isy1 Lea1 Msl1 Prp19 Prp4 Prp45 Rse1 Smd2 Smd3 Snt309 Snu114                             | 8.81E-90 | 65.38                | RNA splicing, via transesterification reactions            | GO:0000375 |
| 13     | Complex 436          | Brr1 Cbc2 Cus1 Lsm4 Prp11 Prp40 Prp42 Prp9 Rse1 Smd1 Smd2 Snp1 Snu56 Snu66 Snu71                                          | 5.09E-66 | 62.50                | RNA splicing, via transesterification reactions            | GO:0000375 |
| 14     | Complex 440          | Brx1 Drs1 Mak21 Nip7 Noc2 Noc3 Nop4 Spb4 Ytm1                                                                             | 4.23E-33 | 64.28                | rRNA processing                                            | GO:0006364 |
| 15     | Complex 447          | Imp3 Ylr003c                                                                                                              | 7.36E-37 | 100                  | rRNA processing                                            | GO:0006364 |
| 16     | Complex 473          | Ecm29 Rpn1 Rpn10 Rpn11 Rpn12 Rpn3 Rpn6 Rpn8 Rpt2 Ura7                                                                     | 2.79E-15 | 71.43                | proteolysis involved in cellular protein catabolic process | GO:0051603 |
| 17     | Complex 477          | Cct8 Tdh2 Tef1 Ufd4                                                                                                       | 4.57E-20 | 66.67                | rRNA processing                                            | GO:0006364 |

Table 7: Protein complexes predicted by PROCOMOSS in DIP dataset using Kappa measure (biological process)

| Sl No. | Real Protein Complex                | Com- Predicted Protein Complex                                                                                      | p-value  | % of protein covered | Most significant GO-term                                   | GO-id      |
|--------|-------------------------------------|---------------------------------------------------------------------------------------------------------------------|----------|----------------------|------------------------------------------------------------|------------|
| 1      | 20S core particle of the proteasome | Ecm29 Pre1 Pre10 Pre3 Pre5 Pre6 Pre8 Pre9 Pup3 Rpn2 Rpn8                                                            | 2.14E-31 | 61.11                | proteolysis involved in cellular protein catabolic process | GO:0051603 |
| 2      | Complex 26                          | Atp2 Met18 Rad3 Tfp1 Tub1 Ydj1                                                                                      | 7.90E-18 | 66.67                | tRNA transcription from RNA polymerase III promoter        | GO:0042797 |
| 3      | RNA polymerase I                    | Ams1 Cdc14 Rpa12 Rpa190 Rpa49 Rpb10 Rpc31 Rpc40 Rpo26 Sro7                                                          | 7.90E-18 | 62.50                | tRNA transcription from RNA polymerase III promoter        | GO:0042797 |
| 4      | 19/22S regulator                    | Ecm29 Pre1 Pre5 Rad50 Rpn1 Rpn10 Rpn11 Rpn12 Rpn13 Rpn2 Rpn5 Rpn6 Rpn7 Rpn8 Rpt1 Rpt2 Rpt3 Rpt5 Rpt6 Ubp6 Rpt3 Tub3 | 2.37E-11 | 64.51                | ubiquitin-dependent protein catabolic process              | GO:0006511 |
| 5      | Complex 109                         |                                                                                                                     | 1.15E-11 | 100                  | proteolysis involved in cellular protein catabolic process | GO:0051603 |
| 6      | Ku complex                          | Yku70 Yku80                                                                                                         | 7.90E-18 | 100                  | tRNA transcription from RNA polymerase III promoter        | GO:0042797 |
| 7      | Complex 187                         | Brr1 Hta1                                                                                                           | 7.36E-49 | 100                  | RNA splicing, via transesterification reactions            | GO:0000375 |
| 8      | Complex 204                         | Psk1 Vas1                                                                                                           | 7.90E-18 | 66.67                | tRNA transcription from RNA polymerase III promoter        | GO:0042797 |
| 9      | Complex 263                         | Aar2 Snu66                                                                                                          | 1.98E-78 | 66.67                | RNA splicing, via transesterification reactions            | GO:0000375 |
| 10     | Complex 288                         | Ret1 Rpc17 Rpc19 Rpc25 Rpc37 Rpc53                                                                                  | 7.90E-18 | 75                   | tRNA transcription from RNA polymerase III promoter        | GO:0042797 |
| 11     | Complex 307                         | Nop13 Rlp7                                                                                                          | 1.54E-24 | 100                  | cellular component biogenesis at cellular level            | GO:0071843 |
| 12     | Complex 384                         | Idh2 Lys12 Rvb2                                                                                                     | 2.37E-11 | 75                   | ubiquitin-dependent protein catabolic process              | GO:0006511 |
| 13     | Complex 440                         | Brx1 Drs1 Mak21 Nip7 Noc2 Noc3 Nop4 Spb4 Ytm1                                                                       | 1.33E-31 | 64.28                | rRNA processing                                            | GO:0006364 |
| 14     | Complex 446                         | Aro1 Rps0a                                                                                                          | 1.15E-11 | 66.67                | proteolysis involved in cellular protein catabolic process | GO:0051603 |
| 15     | Complex 450                         | Ams1 Rpa190 Rpa49 Rpb10 Rpc31 Rpc40 Rpc82 Rpo31 Sro7                                                                | 7.90E-18 | 75                   | tRNA transcription from RNA polymerase III promoter        | GO:0042797 |
| 16     | Complex 473                         | Ecm29 Rpn1 Rpn10 Rpn11 Rpn12 Rpn3 Rpn6 Rpn8 Rpt2 Ura7                                                               | 2.37E-11 | 71.43                | ubiquitin-dependent protein catabolic process              | GO:0006511 |
| 17     | Complex 474                         | Hta1 Tos4                                                                                                           | 1.33E-31 | 100                  | rRNA processing                                            | GO:0006364 |
| 18     | Complex 480                         | Cys4 Sse1                                                                                                           | 1.74E-64 | 66.67                | RNA splicing, via transesterification reactions            | GO:0000375 |

Table 8: Protein complexes predicted by PROCOMOSS in DIP dataset using Jiang measure (molecular function)

| Sl No. | Real Protein Complex                | Predicted Protein Complex                                                                          | p-value  | % of protein covered | Most significant GO-term                                   | GO-id      |
|--------|-------------------------------------|----------------------------------------------------------------------------------------------------|----------|----------------------|------------------------------------------------------------|------------|
| 1      | 20S core particle of the proteasome | Ecm29 Pre1 Pre10 Pre2 Pre3 Pre5 Pre6 Pre8 Pre9 Pup3 Rpn2 Rpn8                                      | 2.06E-29 | 66.67                | proteolysis involved in cellular protein catabolic process | GO:0051603 |
| 2      | Complex 26                          | Atp2 Met18 Rad3 Rpt6 Tfp1 Tub1 Ydj1                                                                | 5.07E-19 | 77.77                | proteolysis involved in cellular protein catabolic process | GO:0051603 |
| 3      | 19/22S regulator                    | Ecm29 Pre1 Pre5 Pre9 Rpn1 Rpn11 Rpn12 Rpn13 Rpn2 Rpn5 Rpn6 Rpn7 Rpn8 Rpt1 Rpt2 Rpt3 Rpt5 Rpt6 Ubp6 | 5.07E-19 | 61.29                | proteolysis involved in cellular protein catabolic process | GO:0051603 |
| 4      | Complex 102                         | Npl3 Nrp1                                                                                          | 2.61E-37 | 66.67                | rRNA processing                                            | GO:0006364 |
| 5      | Ku complex                          | Yku70 Yku80                                                                                        | 3.77E-16 | 100                  | cellular response to stress                                | GO:0033554 |
| 6      | Complex 250                         | Bms1 Ecm16 Utp7 Ygr054w                                                                            | 7.78E-57 | 66.67                | rRNA processing                                            | GO:0006364 |
| 7      | Complex 264                         | Ade6 Pet123                                                                                        | 5.37E-25 | 100                  | rRNA processing                                            | GO:0006364 |
| 8      | Complex 270                         | Clu1 Ura7                                                                                          | 5.37E-25 | 100                  | rRNA processing                                            | GO:0006364 |
| 9      | Complex 307                         | Nop13 Rlp7                                                                                         | 5.37E-25 | 100                  | rRNA processing                                            | GO:0006364 |
| 10     | Complex 440                         | Brx1 Drs1 Mak21 Nip7 Noc2 Noc3 Nop4 Spb4 Ytm1                                                      | 5.37E-25 | 64.29                | rRNA processing                                            | GO:0006364 |
| 11     | Complex 472                         | Dbp10 Dbp9 Drs1 Nip7 Nop13 Nop4 Pol5 Rix7 Rlp7 Rrp12                                               | 5.37E-25 | 66.67                | rRNA processing                                            | GO:0006364 |
| 12     | Complex 473                         | Ecm29 Rpn1 Rpn11 Rpn12 Rpn3 Rpn6 Rpn8 Rpt2 Ura7                                                    | 5.07E-19 | 64.29                | proteolysis involved in cellular protein catabolic process | GO:0051603 |
